# Supplementary material for: Association of improved overall survival with decreased distant metastasis following asparaginase-based chemotherapy and radiotherapy for intermediate- and high-risk early-stage extranodal nasal-type NK/T-cell lymphoma: a CLCG study
Source: PubMed Central journal article supplement — ESMO Open. 2021 Jul 7;6(4):100206. doi: 10.1016/j.esmoop.2021.100206 (PMC8271122; doi:10.1016/j.esmoop.2021.100206), 2021-07-07
Supplement: mmc1.pdf [file mmc1.pdf]

**Supplemental table 1.** Summary of ASP-based and non-ASP-based regimens in 376 early-stage ENKTCL patients who received combined-modality therapy.

| Regimens             | Definition and agents                                                       | All early-stage patients |                            |                            |                        | Intermediate- and high-risk patients |                            |                            |                        |
|----------------------|-----------------------------------------------------------------------------|--------------------------|----------------------------|----------------------------|------------------------|--------------------------------------|----------------------------|----------------------------|------------------------|
|                      |                                                                             | Regimens<br>No. (%)      | Cycles $\geq 4$<br>No. (%) | Cycles $\geq 3$<br>No. (%) | Cycles<br>Median (IQR) | Regimens<br>No. (%)                  | Cycles $\geq 4$<br>No. (%) | Cycles $\geq 3$<br>No. (%) | Cycles<br>Median (IQR) |
| <b>ASP-based</b>     | Regimens containing asparaginase,<br>(ASP/PLA/GEM) platinum and gemcitabine | 286 (76.1)               | 199 (69.6)                 | 245 (85.7)                 | 4 (3-6)                | 236 (74.4)                           | 169 (71.6)                 | 204 (86.4)                 | 4 (3-6)                |
|                      | GELOX Gemcitabine, oxaliplatin, L-asparaginase                              | 119 (31.6)               | 79 (66.4)                  | 100 (84.0)                 | 4 (3-6)                | 102 (32.2)                           | 72 (70.6)                  | 86 (84.3)                  | 4 (3-6)                |
|                      | P-GEMOX Pegaspargase, gemcitabine, oxaliplatin                              | 113 (30.1)               | 83 (73.5)                  | 101 (89.4)                 | 4 (3-6)                | 92 (29.0)                            | 69 (75.0)                  | 83 (90.2)                  | 4 (3.8-6)              |
|                      | GDP-L Gemcitabine, dexamethasone, cisplatin,<br>L-asparaginase              | 41 (10.9)                | 27 (65.9)                  | 34 (82.9)                  | 4 (3-6)                | 34 (10.7)                            | 22 (64.7)                  | 29 (85.3)                  | 4 (3-6)                |
|                      | DDGP Gemcitabine, pegaspargase, cisplatin,<br>dexamethasone                 | 13 (3.5)                 | 10 (76.9)                  | 10 (76.9)                  | 4 (3-5)                | 8 (2.5)                              | 6 (75.0)                   | 6 (75.0)                   | 4.5 (2.5-5.8)          |
| <b>Non-ASP-based</b> | Regimens containing platinum and<br>(PLA/GEM) gemcitabine                   | 90 (23.9)                | 72 (80.0)                  | 80 (88.9)                  | 4 (4-5)                | 81 (25.6)                            | 65 (80.2)                  | 72 (88.9)                  | 4 (4-5)                |
|                      | GDP Gemcitabine, dexamethasone, cisplatin                                   | 73 (19.4)                | 61 (83.6)                  | 66 (90.4)                  | 4 (4-5)                | 66 (20.8)                            | 56 (84.8)                  | 60 (90.9)                  | 4 (4-5)                |
|                      | GEMOX Gemcitabine, oxaliplatin                                              | 9 (2.4)                  | 8 (88.9)                   | 8 (88.9)                   | 4 (4-6)                | 7 (2.2)                              | 6 (85.7)                   | 6 (85.7)                   | 4 (4-6)                |
|                      | GP Gemcitabine, cisplatin                                                   | 8 (2.1)                  | 3 (37.5)                   | 6 (75.0)                   | 3 (2-4)                | 8 (2.5)                              | 3 (37.5)                   | 6 (75.0)                   | 3 (2-4)                |

Abbreviations: ENKTCL, extranodal nasal-type natural killer/T-cell lymphoma; ASP, asparaginase; IQR, interquartile range; PLA, platinum; GEM, gemcitabine

Supplemental Figure 1

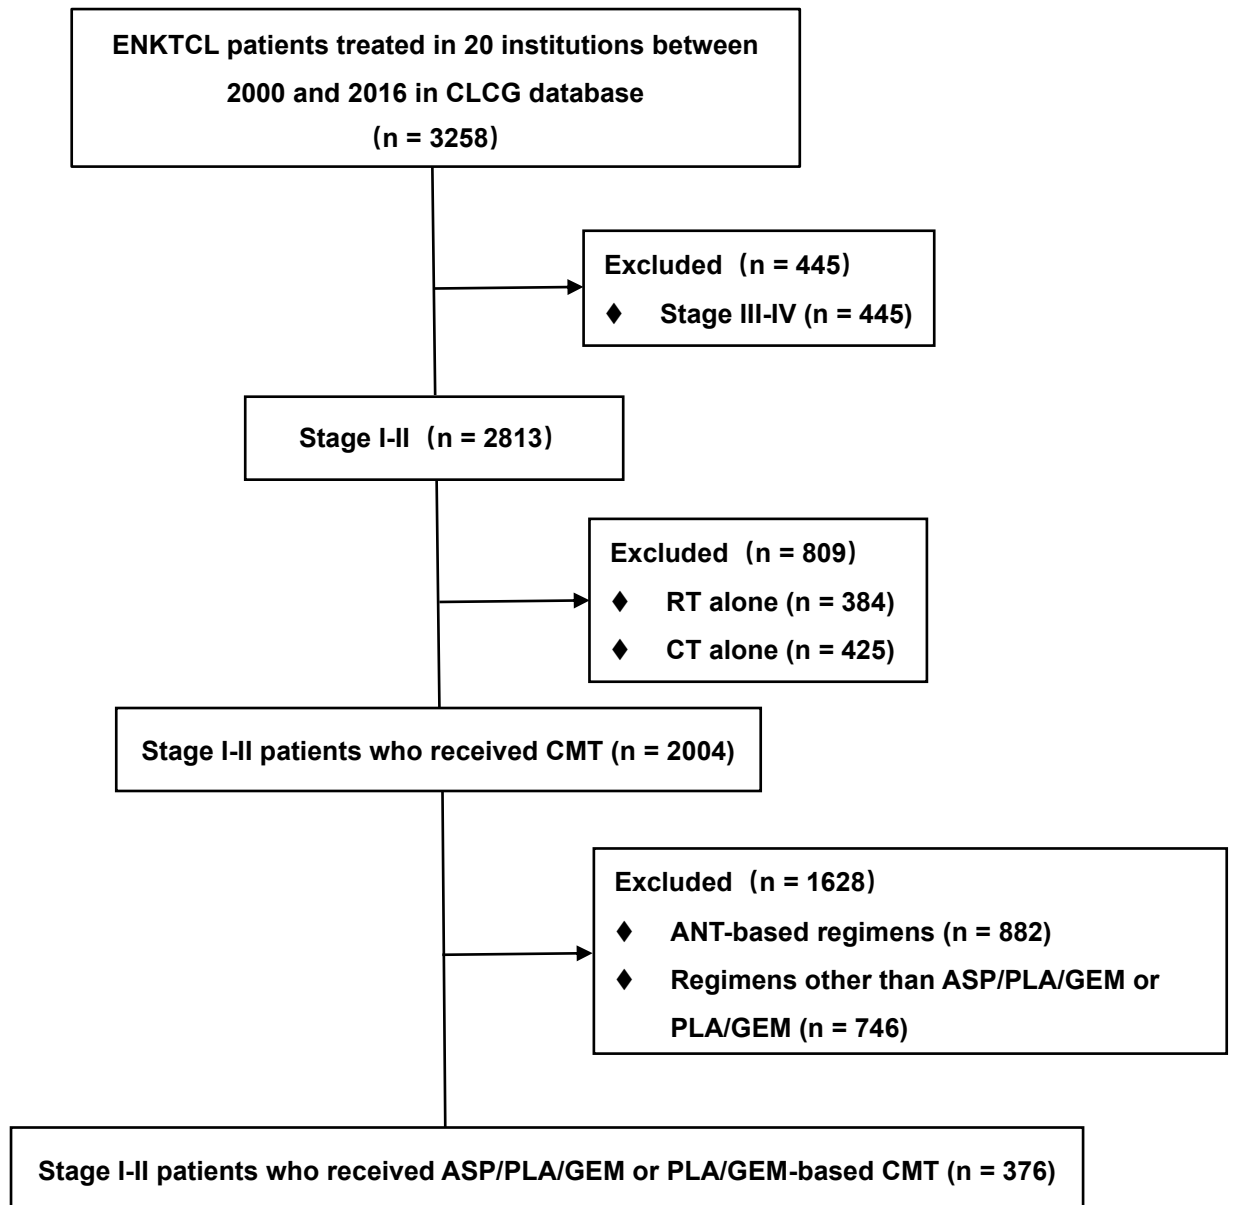

**A**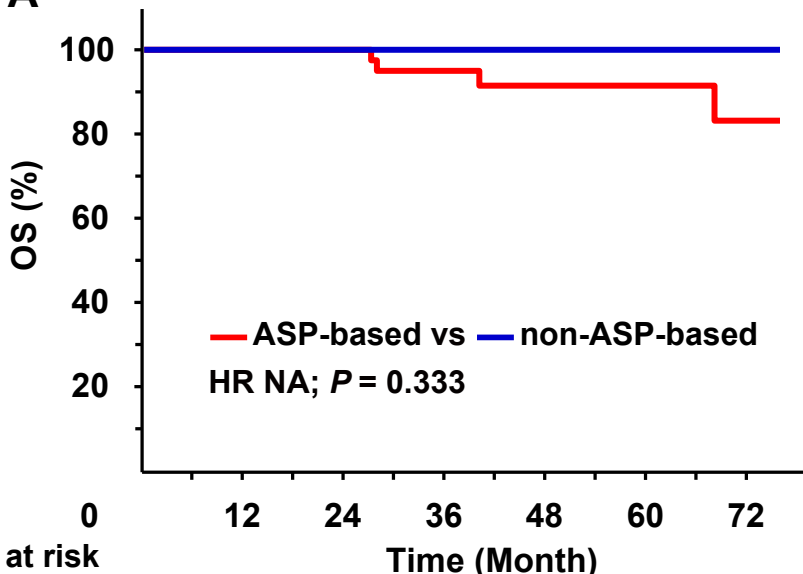

|                | 0  | 12 | 24 | 36 | 48 | 60 | 72 |
|----------------|----|----|----|----|----|----|----|
| Number at risk |    |    |    |    |    |    |    |
| ASP-based      | 50 | 48 | 44 | 29 | 24 | 14 | 8  |
| non-ASP-based  | 9  | 8  | 8  | 7  | 7  | 5  | 3  |

|               |    |    |    |    |    |    |   |
|---------------|----|----|----|----|----|----|---|
| ASP-based     | 50 | 48 | 44 | 29 | 24 | 14 | 8 |
| non-ASP-based | 9  | 8  | 8  | 7  | 7  | 5  | 3 |

**B**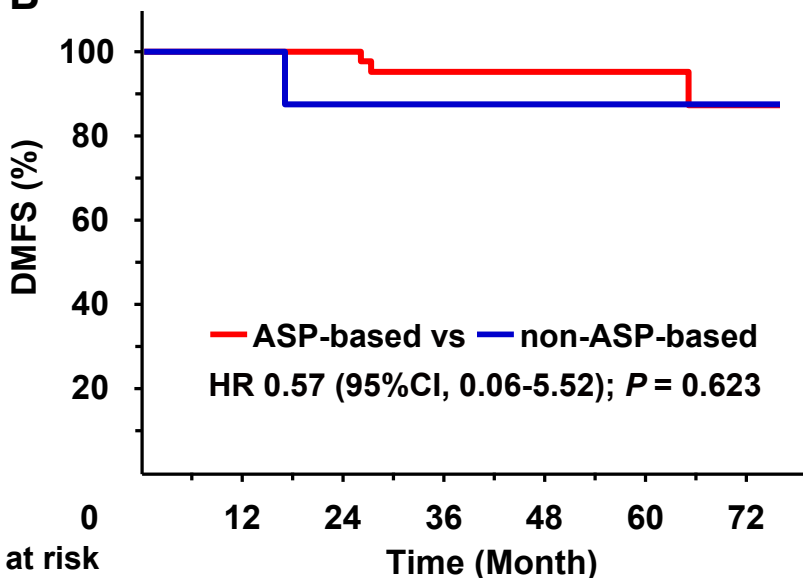

|                | 0  | 12 | 24 | 36 | 48 | 60 | 72 |
|----------------|----|----|----|----|----|----|----|
| Number at risk |    |    |    |    |    |    |    |
| ASP-based      | 50 | 48 | 44 | 29 | 24 | 14 | 8  |
| non-ASP-based  | 9  | 8  | 7  | 6  | 6  | 5  | 3  |

|               |    |    |    |    |    |    |   |
|---------------|----|----|----|----|----|----|---|
| ASP-based     | 50 | 48 | 44 | 29 | 24 | 14 | 8 |
| non-ASP-based | 9  | 8  | 7  | 6  | 6  | 5  | 3 |

**C**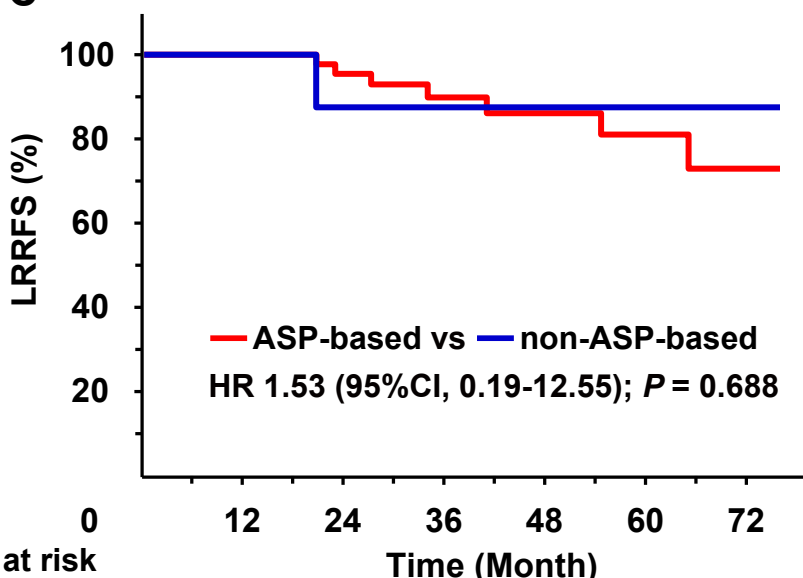

|                | 0  | 12 | 24 | 36 | 48 | 60 | 72 |
|----------------|----|----|----|----|----|----|----|
| Number at risk |    |    |    |    |    |    |    |
| ASP-based      | 50 | 48 | 42 | 26 | 22 | 11 | 7  |
| non-ASP-based  | 9  | 8  | 7  | 6  | 6  | 5  | 3  |

|               |    |    |    |    |    |    |   |
|---------------|----|----|----|----|----|----|---|
| ASP-based     | 50 | 48 | 42 | 26 | 22 | 11 | 7 |
| non-ASP-based | 9  | 8  | 7  | 6  | 6  | 5  | 3 |

Supplemental Figure 3

| Bounding factor    |                   | OR <sub>ASP-U</sub> in all early-stage patients                         |                   |                   |                   |                   |                   |                   |                   |                   |                   |                   |                   |                   |                   |
|--------------------|-------------------|-------------------------------------------------------------------------|-------------------|-------------------|-------------------|-------------------|-------------------|-------------------|-------------------|-------------------|-------------------|-------------------|-------------------|-------------------|-------------------|
|                    |                   | 1.0                                                                     | 1.1               | 1.2               | 1.3               | 1.4               | 1.5               | 1.8               | 2.0               | 2.2               | 2.5               | 3.0               | 3.5               | 4.0               | 5.0               |
| HR <sub>OS-U</sub> | 1.00              | 0.52 (0.30, 0.92)                                                       | 0.52 (0.30, 0.92) | 0.52 (0.30, 0.92) | 0.52 (0.30, 0.92) | 0.52 (0.30, 0.92) | 0.52 (0.30, 0.92) | 0.52 (0.30, 0.92) | 0.52 (0.30, 0.92) | 0.52 (0.30, 0.92) | 0.52 (0.30, 0.92) | 0.52 (0.30, 0.92) | 0.52 (0.30, 0.92) | 0.52 (0.30, 0.92) | 0.52 (0.30, 0.92) |
|                    | 0.95              | 0.52 (0.30, 0.92)                                                       | 0.52 (0.30, 0.92) | 0.52 (0.30, 0.93) | 0.53 (0.30, 0.93) | 0.53 (0.30, 0.93) | 0.53 (0.31, 0.94) | 0.53 (0.31, 0.94) | 0.53 (0.31, 0.94) | 0.53 (0.31, 0.95) | 0.54 (0.31, 0.95) | 0.54 (0.31, 0.95) | 0.54 (0.31, 0.95) | 0.54 (0.31, 0.96) | 0.54 (0.31, 0.96) |
|                    | 0.90              | 0.52 (0.30, 0.92)                                                       | 0.53 (0.30, 0.93) | 0.53 (0.31, 0.94) | 0.53 (0.31, 0.94) | 0.54 (0.31, 0.95) | 0.54 (0.31, 0.95) | 0.55 (0.31, 0.97) | 0.55 (0.32, 0.97) | 0.55 (0.32, 0.98) | 0.55 (0.32, 0.98) | 0.56 (0.32, 0.99) | 0.56 (0.32, 0.99) | 0.56 (0.33, 1.00) | 0.57 (0.33, 1.00) |
|                    | 0.85              | 0.52 (0.30, 0.92)                                                       | 0.53 (0.30, 0.93) | 0.54 (0.31, 0.95) | 0.54 (0.31, 0.96) | 0.55 (0.32, 0.97) | 0.55 (0.32, 0.97) | 0.56 (0.32, 0.99) | 0.57 (0.33, 1.00) | 0.57 (0.33, 1.01) | 0.58 (0.33, 1.02) | 0.58 (0.34, 1.03) | 0.59 (0.34, 1.04) | 0.59 (0.34, 1.04) | 0.59 (0.34, 1.05) |
|                    | 0.80              | 0.52 (0.30, 0.92)                                                       | 0.53 (0.31, 0.94) | 0.54 (0.31, 0.96) | 0.55 (0.32, 0.97) | 0.56 (0.32, 0.99) | 0.56 (0.33, 1.00) | 0.58 (0.33, 1.02) | 0.59 (0.34, 1.04) | 0.59 (0.34, 1.05) | 0.60 (0.35, 1.06) | 0.61 (0.35, 1.07) | 0.61 (0.35, 1.08) | 0.62 (0.36, 1.09) | 0.62 (0.36, 1.10) |
|                    | 0.75              | 0.52 (0.30, 0.92)                                                       | 0.54 (0.31, 0.95) | 0.55 (0.32, 0.97) | 0.56 (0.32, 0.99) | 0.57 (0.33, 1.01) | 0.58 (0.33, 1.02) | 0.60 (0.34, 1.06) | 0.61 (0.35, 1.07) | 0.61 (0.35, 1.09) | 0.62 (0.36, 1.10) | 0.64 (0.37, 1.12) | 0.64 (0.37, 1.14) | 0.65 (0.38, 1.15) | 0.66 (0.38, 1.17) |
|                    | 0.70              | 0.52 (0.30, 0.92)                                                       | 0.54 (0.31, 0.96) | 0.56 (0.32, 0.99) | 0.57 (0.33, 1.01) | 0.58 (0.34, 1.03) | 0.59 (0.34, 1.05) | 0.62 (0.36, 1.10) | 0.63 (0.36, 1.12) | 0.64 (0.37, 1.14) | 0.65 (0.38, 1.16) | 0.67 (0.39, 1.18) | 0.68 (0.39, 1.20) | 0.69 (0.40, 1.22) | 0.70 (0.40, 1.24) |
|                    | 0.65              | 0.52 (0.30, 0.92)                                                       | 0.55 (0.31, 0.97) | 0.57 (0.33, 1.00) | 0.58 (0.34, 1.03) | 0.60 (0.35, 1.06) | 0.61 (0.35, 1.09) | 0.64 (0.37, 1.14) | 0.66 (0.38, 1.17) | 0.67 (0.39, 1.19) | 0.69 (0.40, 1.22) | 0.71 (0.41, 1.25) | 0.72 (0.42, 1.27) | 0.73 (0.42, 1.29) | 0.74 (0.43, 1.32) |
|                    | 0.60              | 0.52 (0.30, 0.92)                                                       | 0.55 (0.32, 0.98) | 0.58 (0.33, 1.02) | 0.60 (0.35, 1.06) | 0.62 (0.36, 1.10) | 0.64 (0.37, 1.12) | 0.67 (0.39, 1.19) | 0.69 (0.40, 1.23) | 0.71 (0.41, 1.25) | 0.73 (0.42, 1.29) | 0.75 (0.43, 1.33) | 0.77 (0.44, 1.36) | 0.78 (0.45, 1.38) | 0.8 (0.46, 1.41)  |
|                    | 0.55              | 0.52 (0.30, 0.92)                                                       | 0.56 (0.32, 0.99) | 0.59 (0.34, 1.05) | 0.62 (0.36, 1.09) | 0.64 (0.37, 1.14) | 0.66 (0.38, 1.17) | 0.71 (0.41, 1.25) | 0.73 (0.42, 1.30) | 0.75 (0.43, 1.33) | 0.78 (0.45, 1.37) | 0.80 (0.46, 1.42) | 0.82 (0.48, 1.46) | 0.84 (0.48, 1.48) | 0.86 (0.50, 1.52) |
|                    | 0.50              | 0.52 (0.30, 0.92)                                                       | 0.57 (0.33, 1.00) | 0.61 (0.35, 1.07) | 0.64 (0.37, 1.13) | 0.67 (0.39, 1.18) | 0.69 (0.40, 1.23) | 0.75 (0.43, 1.33) | 0.78 (0.45, 1.38) | 0.80 (0.46, 1.42) | 0.83 (0.48, 1.47) | 0.87 (0.50, 1.53) | 0.89 (0.51, 1.58) | 0.91 (0.53, 1.61) | 0.94 (0.54, 1.66) |
|                    | 0.45              | 0.52 (0.30, 0.92)                                                       | 0.58 (0.33, 1.02) | 0.63 (0.36, 1.11) | 0.67 (0.38, 1.18) | 0.70 (0.40, 1.24) | 0.73 (0.42, 1.29) | 0.80 (0.46, 1.42) | 0.84 (0.48, 1.48) | 0.87 (0.50, 1.53) | 0.90 (0.52, 1.59) | 0.94 (0.54, 1.67) | 0.97 (0.56, 1.72) | 1.00 (0.58, 1.76) | 1.03 (0.59, 1.82) |
|                    | 0.40              | 0.52 (0.30, 0.92)                                                       | 0.59 (0.34, 1.05) | 0.65 (0.38, 1.15) | 0.70 (0.40, 1.24) | 0.74 (0.43, 1.31) | 0.78 (0.45, 1.38) | 0.87 (0.50, 1.53) | 0.91 (0.53, 1.61) | 0.95 (0.55, 1.67) | 0.99 (0.57, 1.75) | 1.04 (0.60, 1.84) | 1.08 (0.62, 1.91) | 1.11 (0.64, 1.96) | 1.14 (0.66, 2.02) |
|                    | 0.35              | 0.52 (0.30, 0.92)                                                       | 0.61 (0.35, 1.08) | 0.68 (0.39, 1.20) | 0.74 (0.43, 1.31) | 0.80 (0.46, 1.41) | 0.84 (0.49, 1.49) | 0.95 (0.55, 1.68) | 1.00 (0.58, 1.77) | 1.05 (0.60, 1.85) | 1.10 (0.63, 1.95) | 1.16 (0.67, 2.06) | 1.21 (0.70, 2.14) | 1.24 (0.72, 2.20) | 1.29 (0.75, 2.29) |
|                    | 0.30              | 0.52 (0.30, 0.92)                                                       | 0.63 (0.36, 1.12) | 0.72 (0.42, 1.28) | 0.80 (0.46, 1.42) | 0.87 (0.50, 1.53) | 0.92 (0.53, 1.64) | 1.06 (0.61, 1.87) | 1.13 (0.65, 1.99) | 1.18 (0.68, 2.09) | 1.25 (0.72, 2.21) | 1.33 (0.77, 2.35) | 1.39 (0.80, 2.45) | 1.43 (0.83, 2.53) | 1.49 (0.86, 2.64) |
| 0.25               | 0.52 (0.30, 0.92) | 0.66 (0.38, 1.17)                                                       | 0.78 (0.45, 1.38) | 0.88 (0.51, 1.56) | 0.97 (0.56, 1.71) | 1.04 (0.60, 1.84) | 1.21 (0.70, 2.15) | 1.30 (0.75, 2.30) | 1.37 (0.79, 2.43) | 1.46 (0.84, 2.58) | 1.56 (0.90, 2.76) | 1.63 (0.94, 2.89) | 1.69 (0.98, 2.99) | 1.77 (1.02, 3.13) |                   |
| 0.20               | 0.52 (0.30, 0.92) | 0.71 (0.41, 1.25)                                                       | 0.87 (0.50, 1.53) | 1.00 (0.58, 1.77) | 1.11 (0.64, 1.97) | 1.21 (0.70, 2.15) | 1.44 (0.83, 2.56) | 1.56 (0.90, 2.76) | 1.65 (0.95, 2.93) | 1.77 (1.02, 3.13) | 1.91 (1.10, 3.37) | 2.01 (1.16, 3.55) | 2.08 (1.20, 3.68) | 2.18 (1.26, 3.86) |                   |
| Bounding factor    |                   | OR <sub>ASP-U</sub> in intermediate- and high-risk early-stage patients |                   |                   |                   |                   |                   |                   |                   |                   |                   |                   |                   |                   |                   |
|                    |                   | 1.0                                                                     | 1.1               | 1.2               | 1.3               | 1.4               | 1.5               | 1.8               | 2.0               | 2.2               | 2.5               | 3.0               | 3.5               | 4.0               | 5.0               |
| HR <sub>OS-U</sub> | 1.00              | 0.45 (0.25, 0.80)                                                       | 0.45 (0.25, 0.80) | 0.45 (0.25, 0.80) | 0.45 (0.25, 0.80) | 0.45 (0.25, 0.80) | 0.45 (0.25, 0.80) | 0.45 (0.25, 0.80) | 0.45 (0.25, 0.80) | 0.45 (0.25, 0.80) | 0.45 (0.25, 0.80) | 0.45 (0.25, 0.80) | 0.45 (0.25, 0.80) | 0.45 (0.25, 0.80) | 0.45 (0.25, 0.80) |
|                    | 0.95              | 0.45 (0.25, 0.80)                                                       | 0.45 (0.25, 0.80) | 0.45 (0.25, 0.81) | 0.46 (0.25, 0.81) | 0.46 (0.25, 0.81) | 0.46 (0.25, 0.81) | 0.46 (0.26, 0.82) | 0.46 (0.26, 0.82) | 0.46 (0.26, 0.82) | 0.46 (0.26, 0.83) | 0.47 (0.26, 0.83) | 0.47 (0.26, 0.83) | 0.47 (0.26, 0.83) | 0.47 (0.26, 0.83) |
|                    | 0.90              | 0.45 (0.25, 0.80)                                                       | 0.45 (0.25, 0.81) | 0.46 (0.25, 0.81) | 0.46 (0.26, 0.82) | 0.46 (0.26, 0.83) | 0.47 (0.26, 0.83) | 0.47 (0.26, 0.84) | 0.48 (0.26, 0.84) | 0.48 (0.27, 0.85) | 0.48 (0.27, 0.85) | 0.48 (0.27, 0.86) | 0.49 (0.27, 0.86) | 0.49 (0.27, 0.87) | 0.49 (0.27, 0.87) |
|                    | 0.85              | 0.45 (0.25, 0.80)                                                       | 0.46 (0.25, 0.81) | 0.46 (0.26, 0.82) | 0.47 (0.26, 0.83) | 0.47 (0.26, 0.84) | 0.48 (0.26, 0.85) | 0.49 (0.27, 0.86) | 0.49 (0.27, 0.87) | 0.49 (0.27, 0.88) | 0.50 (0.28, 0.88) | 0.50 (0.28, 0.89) | 0.51 (0.28, 0.90) | 0.51 (0.28, 0.91) | 0.51 (0.29, 0.91) |
|                    | 0.80              | 0.45 (0.25, 0.80)                                                       | 0.46 (0.26, 0.82) | 0.47 (0.26, 0.83) | 0.48 (0.26, 0.85) | 0.48 (0.27, 0.86) | 0.49 (0.27, 0.87) | 0.50 (0.28, 0.89) | 0.51 (0.28, 0.90) | 0.51 (0.28, 0.91) | 0.52 (0.29, 0.92) | 0.53 (0.29, 0.93) | 0.53 (0.29, 0.94) | 0.53 (0.30, 0.95) | 0.54 (0.30, 0.96) |
|                    | 0.75              | 0.45 (0.25, 0.80)                                                       | 0.46 (0.26, 0.82) | 0.48 (0.26, 0.84) | 0.48 (0.27, 0.86) | 0.49 (0.27, 0.88) | 0.50 (0.28, 0.89) | 0.52 (0.29, 0.92) | 0.53 (0.29, 0.93) | 0.53 (0.30, 0.95) | 0.54 (0.30, 0.96) | 0.55 (0.31, 0.98) | 0.56 (0.31, 0.99) | 0.56 (0.31, 1.00) | 0.57 (0.32, 1.01) |
|                    | 0.70              | 0.45 (0.25, 0.80)                                                       | 0.47 (0.26, 0.83) | 0.48 (0.27, 0.86) | 0.49 (0.27, 0.88) | 0.51 (0.28, 0.90) | 0.51 (0.29, 0.91) | 0.54 (0.30, 0.95) | 0.55 (0.30, 0.97) | 0.56 (0.31, 0.99) | 0.57 (0.31, 1.01) | 0.58 (0.32, 1.03) | 0.59 (0.33, 1.04) | 0.59 (0.33, 1.06) | 0.60 (0.34, 1.07) |
|                    | 0.65              | 0.45 (0.25, 0.80)                                                       | 0.47 (0.26, 0.84) | 0.49 (0.27, 0.87) | 0.51 (0.28, 0.90) | 0.52 (0.29, 0.92) | 0.53 (0.29, 0.94) | 0.56 (0.31, 0.99) | 0.57 (0.32, 1.02) | 0.58 (0.32, 1.03) | 0.60 (0.33, 1.06) | 0.61 (0.34, 1.09) | 0.62 (0.35, 1.11) | 0.63 (0.35, 1.12) | 0.64 (0.36, 1.14) |
|                    | 0.60              | 0.45 (0.25, 0.80)                                                       | 0.48 (0.27, 0.85) | 0.50 (0.28, 0.89) | 0.52 (0.29, 0.92) | 0.54 (0.30, 0.95) | 0.55 (0.31, 0.98) | 0.58 (0.32, 1.04) | 0.60 (0.33, 1.07) | 0.61 (0.34, 1.09) | 0.63 (0.35, 1.12) | 0.65 (0.36, 1.16) | 0.66 (0.37, 1.18) | 0.68 (0.38, 1.20) | 0.69 (0.38, 1.23) |
|                    | 0.55              | 0.45 (0.25, 0.80)                                                       | 0.48 (0.27, 0.86) | 0.51 (0.28, 0.91) | 0.53 (0.30, 0.95) | 0.56 (0.31, 0.99) | 0.57 (0.32, 1.02) | 0.61 (0.34, 1.09) | 0.63 (0.35, 1.13) | 0.65 (0.36, 1.16) | 0.67 (0.37, 1.19) | 0.70 (0.39, 1.24) | 0.71 (0.40, 1.27) | 0.73 (0.40, 1.29) | 0.74 (0.41, 1.32) |
|                    | 0.50              | 0.45 (0.25, 0.80)                                                       | 0.49 (0.27, 0.87) | 0.53 (0.29, 0.93) | 0.55 (0.31, 0.98) | 0.58 (0.32, 1.03) | 0.60 (0.33, 1.07) | 0.65 (0.36, 1.16) | 0.68 (0.38, 1.20) | 0.70 (0.39, 1.24) | 0.72 (0.40, 1.28) | 0.75 (0.42, 1.33) | 0.77 (0.43, 1.37) | 0.79 (0.44, 1.40) | 0.81 (0.45, 1.44) |
|                    | 0.45              | 0.45 (0.25, 0.80)                                                       | 0.50 (0.28, 0.89) | 0.54 (0.30, 0.96) | 0.58 (0.32, 1.03) | 0.61 (0.34, 1.08) | 0.63 (0.35, 1.13) | 0.69 (0.39, 1.23) | 0.73 (0.40, 1.29) | 0.75 (0.42, 1.33) | 0.78 (0.43, 1.39) | 0.82 (0.45, 1.45) | 0.84 (0.47, 1.50) | 0.86 (0.48, 1.53) | 0.89 (0.49, 1.58) |
|                    | 0.40              | 0.45 (0.25, 0.80)                                                       | 0.51 (0.28, 0.91) | 0.56 (0.31, 1.00) | 0.61 (0.34, 1.08) | 0.64 (0.36, 1.14) | 0.68 (0.38, 1.20) | 0.75 (0.42, 1.33) | 0.79 (0.44, 1.40) | 0.82 (0.45, 1.45) | 0.86 (0.48, 1.52) | 0.90 (0.50, 1.60) | 0.93 (0.52, 1.66) | 0.96 (0.53, 1.70) | 0.99 (0.55, 1.76) |
|                    | 0.35              | 0.45 (0.25, 0.80)                                                       | 0.53 (0.29, 0.94) | 0.59 (0.33, 1.05) | 0.64 (0.36, 1.14) | 0.69 (0.38, 1.22) | 0.73 (0.40, 1.30) | 0.82 (0.46, 1.46) | 0.87 (0.48, 1.54) | 0.91 (0.50, 1.61) | 0.95 (0.53, 1.69) | 1.01 (0.56, 1.79) | 1.05 (0.58, 1.86) | 1.08 (0.60, 1.91) | 1.12 (0.62, 1.99) |
|                    | 0.30              | 0.45 (0.25, 0.80)                                                       | 0.55 (0.30, 0.97) | 0.63 (0.35, 1.11) | 0.69 (0.38, 1.23) | 0.75 (0.42, 1.33) | 0.80 (0.44, 1.42) | 0.92 (0.51, 1.63) | 0.98 (0.54, 1.73) | 1.02 (0.57, 1.82) | 1.08 (0.60, 1.92) | 1.15 (0.64, 2.04) | 1.20 (0.67, 2.13) | 1.24 (0.69, 2.20) | 1.29 (0.72, 2.29) |
| 0.25               | 0.45 (0.25, 0.80) | 0.57 (0.32, 1.02)                                                       | 0.68 (0.38, 1.20) | 0.76 (0.42, 1.35) | 0.84 (0.46, 1.49) | 0.90 (0.50, 1.60) | 1.05 (0.58, 1.87) | 1.13 (0.63, 2.00) | 1.19 (0.66, 2.11) | 1.26 (0.70, 2.24) | 1.35 (0.75, 2.40) | 1.41 (0.79, 2.51) | 1.46 (0.81, 2.60) | 1.53 (0.85, 2.72) |                   |
| 0.20               | 0.45 (0.25, 0.80) | 0.61 (0.34, 1.09)                                                       | 0.75 (0.42, 1.33) | 0.87 (0.48, 1.54) | 0.96 (0.54, 1.71) | 1.05 (0.58, 1.87) | 1.25 (0.69, 2.22) | 1.35 (0.75, 2.40) | 1.43 (0.80, 2.55) | 1.53 (0.85, 2.72) | 1.65 (0.92, 2.93) | 1.74 (0.96, 3.09) | 1.80 (1.00, 3.20) | 1.89 (1.05, 3.36) |                   |

Supplemental Figure 4

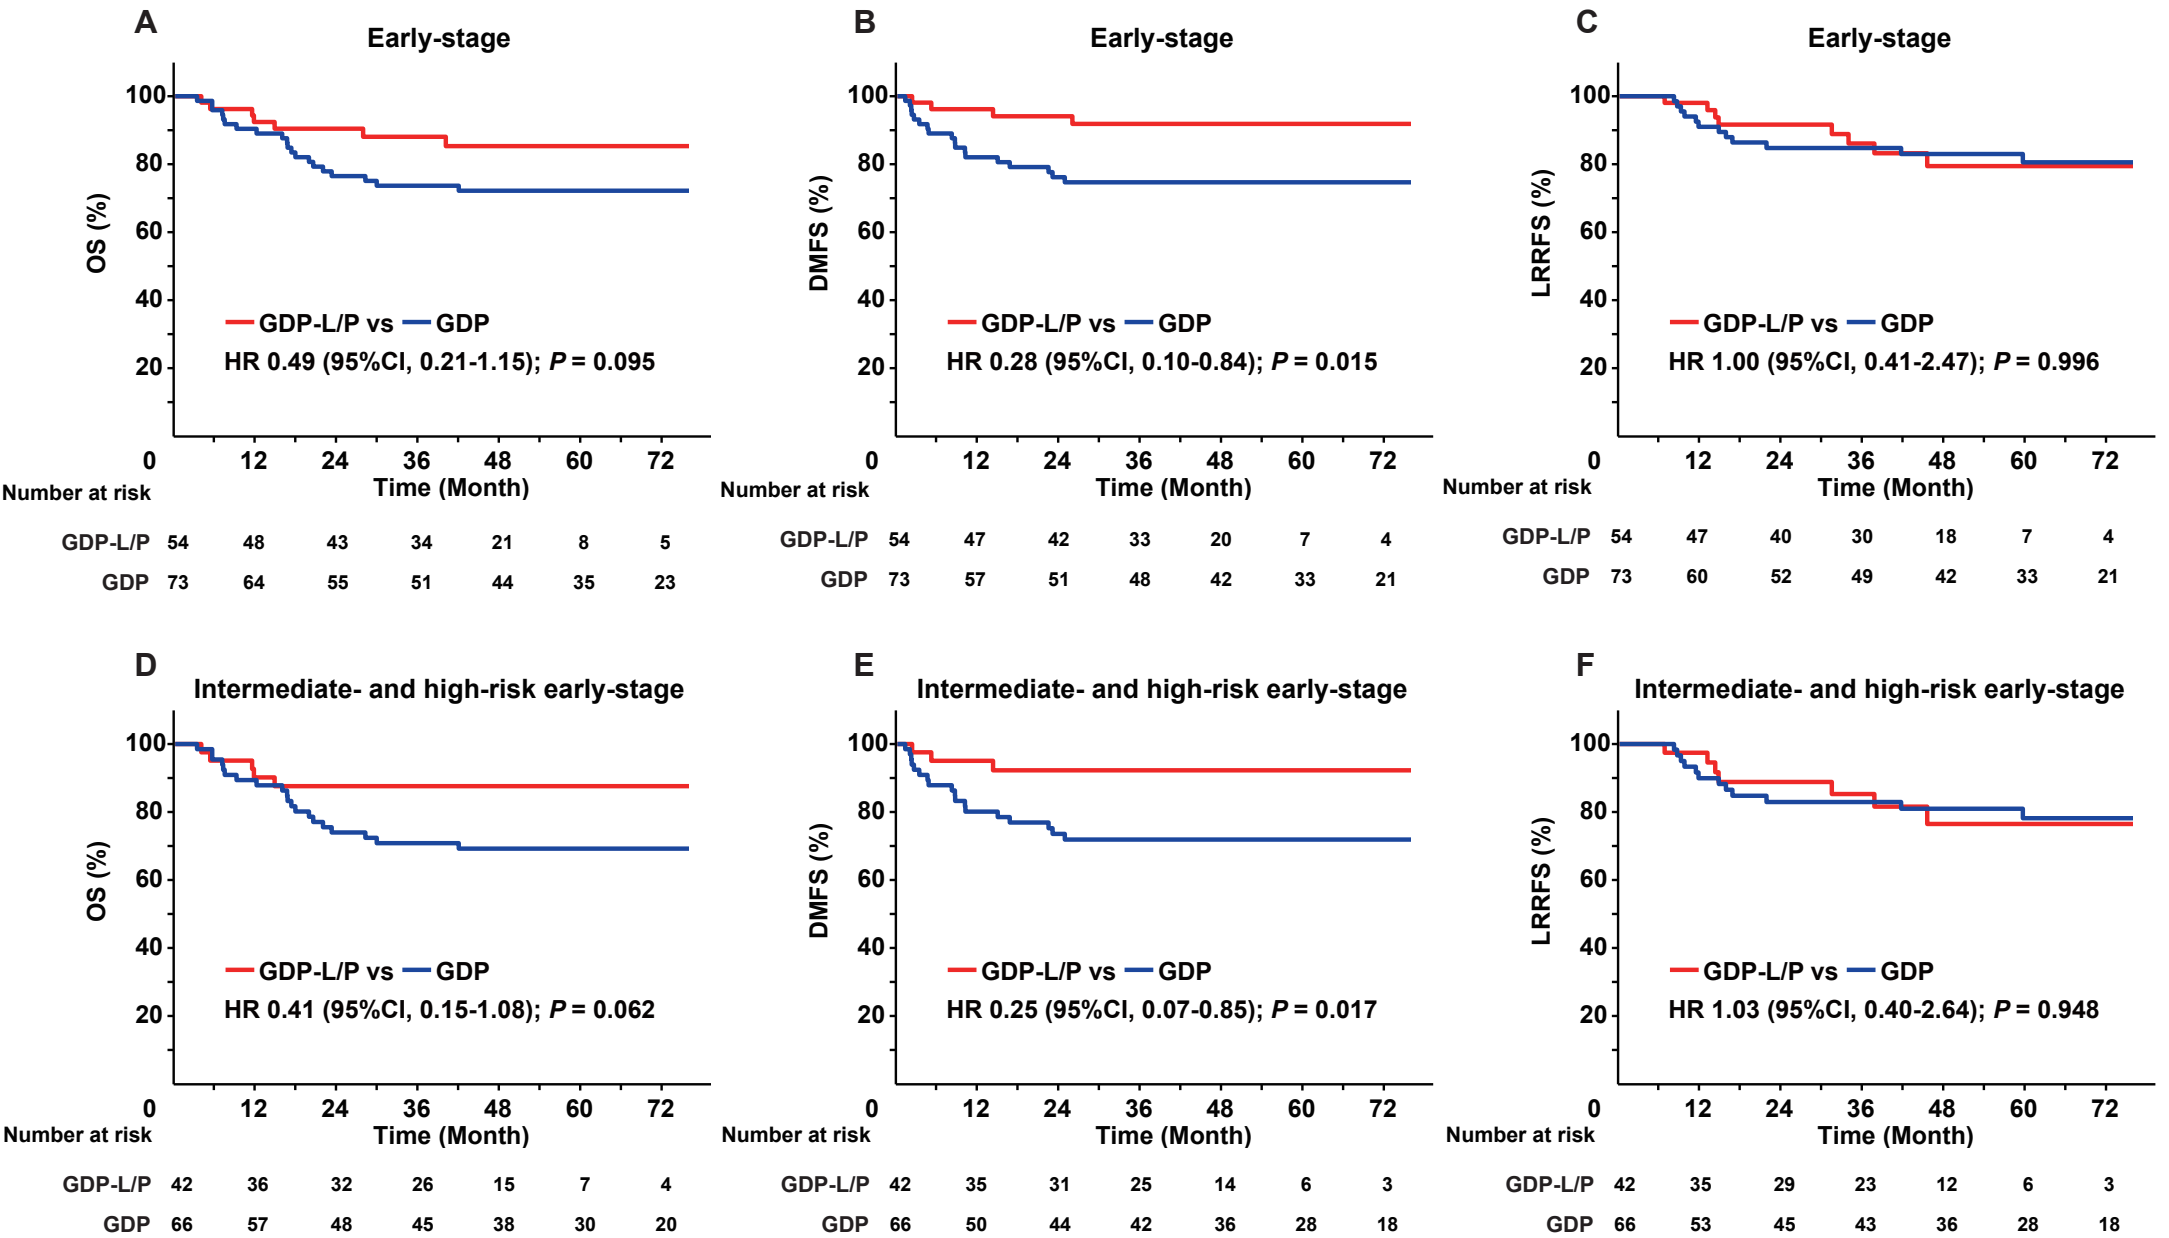

**Supplemental Figure 1. CONSORT diagram.** Abbreviations: ENKTCL, extranodal nasal-type natural killer/T-cell lymphoma; CLCG, China Lymphoma Collaborative Group; RT, radiotherapy; CT, chemotherapy; CMT, combined-modality therapy; ANT, anthracycline; ASP, asparaginase; PLA, platinum; GEM, gemcitabine.

**Supplemental Figure 2. OS, DMFS and LRRFS stratified by chemotherapy regimens in low-risk early-stage patients.** OS (A), DMFS (B) and LRRFS (C) of ASP-based regimens vs. non-ASP-based regimens in low-risk patients. Abbreviations: OS, overall survival; DMFS, distant metastasis-free survival; LRRFS, locoregional recurrence-free survival; ASP, asparaginase.

**Supplemental Figure 3. Magnitudes of the joint bounding factor for different combinations of the  $OR_{ASP-U}$  and the  $HR_{OS-U}$  for all early-stage patients and intermediate- to high-risk patients.** Columns correspond to increasing imbalance in unmeasured confounders between treatment groups. Rows correspond to increasing adverse effect of unmeasured confounders on overall survival. The entries in the table represent HR (with 95% CI) of ASP-based regimens versus non-ASP-based regimens in presence of unmeasured confounders with a given combination of imbalance ( $OR_{ASP-U}$ ) and impact on overall survival ( $HR_{OS-U}$ ). The present sensitivity analysis allows for testing the treatment effect of ASP-based regimens versus non-ASP-based regimens in presence of unmeasured confounders with varying combination of imbalance between treatment groups and impact on overall survival. The HR is

colored as significant (blue), nonsignificant (orange), and reverse treatment effect (red), respectively. Abbreviations: OR, odd ratio; HR, hazard ratio; ASP, asparaginase (L-asparaginase, or pegaspargase).

**Supplemental Figure 4. Sensitivity analysis of GDP-ASP vs. GDP.** OS (A), DMFS (B) and LRRFS (C) of GDP-L/P vs. GDP in early-stage patients. OS (A), DMFS (B) and LRRFS (C) of GDP-L/P vs. GDP in intermediate- and high-risk early-stage patients. Abbreviations: OS, overall survival; DMFS, distant metastasis-free survival; LRRFS, locoregional recurrence-free survival; GDP (gemcitabine, dexamethasone, cisplatin); ASP, asparaginase (L-asparaginase or pegaspargase); GDP-L (gemcitabine, dexamethasone, cisplatin and L-asparaginase); GDP-P (gemcitabine, cisplatin, dexamethasone, pegaspargase); HR, hazard ratio; CI, confidence interval.
